# Supplementary material for: Combined Snail and E-cadherin Predicts Overall Survival of Cervical Carcinoma Patients: Comparison Among Various Epithelial-Mesenchymal Transition Proteins
Source: PubMed Central journal article supplement (PMC7058927; doi:10.3389/fmolb.2020.00022), 2020-02-28
Supplement: Table_1.pdf [file Table_1.pdf]

## SUPPLEMENTARY MATERIAL

**TABLE S1 | Expression of Snail, E-cadherin, Slug, ZEB1, Twist, Vimentin, and Survivin in cervical carcinoma and para-carcinoma tissue samples.**

| <b>Variables</b>           | <b>High expression (n)</b> | <b>Low expression (n)</b> | <b>X<sup>2</sup></b> | <b>P-value</b> |
|----------------------------|----------------------------|---------------------------|----------------------|----------------|
| <b>Snail</b>               |                            |                           | 18.440               | < 0.001        |
| Carcinoma (203)            | 127                        | 76                        |                      |                |
| Para-carcinoma (56)        | 17                         | 39                        |                      |                |
| <b>E-cadherin</b>          |                            |                           | 10.985               | 0.001          |
| Carcinoma (203)            | 80                         | 123                       |                      |                |
| Para-carcinoma (56)        | 36                         | 20                        |                      |                |
| <b>Slug</b>                |                            |                           | 0.855                | 0.355          |
| Carcinoma (203)            | 112                        | 91                        |                      |                |
| Para-carcinoma (56)        | 27                         | 29                        |                      |                |
| <b>ZEB1 expression</b>     |                            |                           | 1.231                | 0.267          |
| Carcinoma (203)            | 104                        | 99                        |                      |                |
| Para-carcinoma (56)        | 24                         | 32                        |                      |                |
| <b>Twist expression</b>    |                            |                           | 2.584                | 0.108          |
| Carcinoma (203)            | 108                        | 95                        |                      |                |
| Para-carcinoma (56)        | 23                         | 33                        |                      |                |
| <b>Vimentin expression</b> |                            |                           | 9.715                | 0.002          |
| Carcinoma (203)            | 113                        | 90                        |                      |                |
| Para-carcinoma (56)        | 18                         | 38                        |                      |                |
| <b>Survivin expression</b> |                            |                           | 3.358                | 0.067          |
| Carcinoma (203)            | 115                        | 88                        |                      |                |
| Para-carcinoma (56)        | 24                         | 32                        |                      |                |
