# Supplementary material for: Combined Snail and E-cadherin Predicts Overall Survival of Cervical Carcinoma Patients: Comparison Among Various Epithelial-Mesenchymal Transition Proteins
Source: PubMed Central journal article supplement (PMC7058927; doi:10.3389/fmolb.2020.00022), 2020-02-28
Supplement: Table_2.pdf [file Table_2.pdf]

## SUPPLEMENTARY MATERIAL

**TABLE S2 | Correlation of Slug, ZEB1, Twist, Vimentin, and Survivin expression with the clinicopathologic characteristics of 203 cervical carcinoma patients.**

|                              | n   | High<br>expressio<br>n of Slug<br>n (%) | <i>P</i> -<br>value | High<br>expression<br>of ZEB1 n<br>(%) | <i>P</i> -<br>value | High<br>expressio<br>n of Twist<br>n (%) | <i>P</i> -<br>value | High<br>expression<br>of Vimentin<br>n (%) | <i>P</i> -<br>value | High<br>expression<br>of Survivin<br>n (%) | <i>P</i> -<br>value |
|------------------------------|-----|-----------------------------------------|---------------------|----------------------------------------|---------------------|------------------------------------------|---------------------|--------------------------------------------|---------------------|--------------------------------------------|---------------------|
| <b>Age (years)</b>           |     |                                         |                     |                                        |                     |                                          |                     |                                            |                     |                                            |                     |
| <55                          | 89  | 48 (53.9)                               | 0.754               | 39 (43.8)                              | 0.062               | 49 (55.0)                                | 0.640               | 43 (48.3)                                  | 0.063               | 44 (49.4)                                  | 0.067               |
| ≥55                          | 114 | 64 (56.1)                               |                     | 65 (57.0)                              |                     | 59 (51.8)                                |                     | 70 (61.4)                                  |                     | 71 (62.3)                                  |                     |
| <b>FIGO stage</b>            |     |                                         |                     |                                        |                     |                                          |                     |                                            |                     |                                            |                     |
| I–II                         | 107 | 69 (64.5)                               | <0.001              | 52 (48.6)                              | 0.428               | 43 (40.2)                                | <0.001              | 43 (40.2)                                  | <0.001              | 48 (44.9)                                  | <0.001              |
| III–IV                       | 96  | 43 (44.8)                               |                     | 52 (54.2)                              |                     | 65 (67.7)                                |                     | 70 (72.9)                                  |                     | 67 (69.8)                                  |                     |
| <b>Histological grade</b>    |     |                                         |                     |                                        |                     |                                          |                     |                                            |                     |                                            |                     |
| (G1-G2)                      | 130 | 67 (52.3)                               | 0.290               | 60 (46.2)                              | 0.105               | 58 (44.6)                                | 0.003               | 63 (48.5)                                  | 0.016               | 70 (53.8)                                  | 0.461               |
| (G3)                         | 70  | 45 (62.9)                               |                     | 44 (62.9)                              |                     | 50 (71.4)                                |                     | 50 (71.4)                                  |                     | 45 (64.3)                                  |                     |
| <b>Lymph node metastasis</b> |     |                                         |                     |                                        |                     |                                          |                     |                                            |                     |                                            |                     |
| No                           | 118 | 41 (34.7)                               | <0.001              | 55 (46.7)                              | 0.121               | 46 (39.0)                                | <0.001              | 49 (41.5)                                  | <0.001              | 48 (40.7)                                  | <0.001              |
| Yes                          | 85  | 71 (83.5)                               |                     | 49 (57.6)                              |                     | 62 (72.9)                                |                     | 64 (75.3)                                  |                     | 67 (78.8)                                  |                     |
| <b>Histological type</b>     |     |                                         |                     |                                        |                     |                                          |                     |                                            |                     |                                            |                     |
| SCC                          | 164 | 91 (55.5)                               | 0.853               | 88 (53.7)                              | 0.156               | 90 (54.9)                                | 0.326               | 92 (56.1)                                  | 0.799               | 88 (53.7)                                  | 0.078               |
| other<br>(AD/ASC)            | 39  | 21 (53.8)                               |                     | 16 (41.0)                              |                     | 18 (46.2)                                |                     | 21 (53.8)                                  |                     | 27 (69.2)                                  |                     |

**Abbreviations:** AD, adenocarcinoma; ASC, adenosquamous cell carcinoma; CI, confidence interval; FIGO, International Federation of Gynecology and Obstetrics; SCC, squamous cell carcinoma. Bold font indicates *P*-values <0.05
